# Supplementary material
Source: publisher figshare collection journal article supplement (https://gsapubs.figshare.com/articles/dataset/_/21860211)
Supplement: Supplementary file 1 [file 1]

## Sheet: FrenchmanMtn_Sorted_Data
Strat Position (m)	Formation	Member	d13C	d18O				Rowland, S.M., Korolev, S., Hagadorn, J.W., and Ghosh, K., 2023, Frenchman Mountain Dolostone: A new formation of the Cambrian Tonto Group, Grand Canyon and Basin and Range, USA: Geosphere, v. 19, https://doi.org/10.1130/GES02514.1
0	Vishnu Schist	-	-	-
48.19	Tapeats	-	-	-
176.76	Bright Angel	Lyndon Limestone	-0.89944	-8.01148
177.76	Bright Angel	Lyndon Limestone	-0.787191	-8.3613
178.76	Bright Angel	Lyndon Limestone	-0.801007	-8.03667
179.76	Bright Angel	Lyndon Limestone	-0.391224	-8.5894
180.76	Bright Angel	Lyndon Limestone	-0.696734	-9.16765
181.76	Bright Angel	Lyndon Limestone	-0.0854043	-8.77974
182.76	Bright Angel	Lyndon Limestone	-2.06478	-9.75371
183.76	Bright Angel	Lyndon Limestone	0.215158	-8.61438
184.76	Bright Angel	Lyndon Limestone	-3.93848	-10.9317
185.76	Bright Angel	Lyndon Limestone	-5.13685	-11.9266
186.76	Bright Angel	Lyndon Limestone	-0.00855568	-8.79679
187.76	Bright Angel	Lyndon Limestone	-0.15236	-9.03126
188.76	Bright Angel	Lyndon Limestone	0.0142804	-7.47166
189.76	Bright Angel	Lyndon Limestone	-0.224038	-6.81235
190.76	Bright Angel	Lyndon Limestone	-0.834065	-7.98106
191.76	Bright Angel	Lyndon Limestone	-0.775635	-8.50251
192.76	Bright Angel	Lyndon Limestone	-0.804663	-8.50452
193.76	Bright Angel	Lyndon Limestone	-0.883348	-9.00215
194.76	Bright Angel	Lyndon Limestone	-0.731236	-8.36798
195.76	Bright Angel	Lyndon Limestone	-0.60892	-7.13672
196.76	Bright Angel	Lyndon Limestone	-0.188873	-6.93959
197.76	Bright Angel	Lyndon Limestone	-0.610045	-7.87353
198.76	Bright Angel	Lyndon Limestone	-2.61824	-9.9518
199.76	Bright Angel	Lyndon Limestone	-0.701137	-7.79685
200.76	Bright Angel	Lyndon Limestone	-2.088	-9.05163
201.76	Bright Angel	Lyndon Limestone	-0.617543	-7.35724
202.76	Bright Angel	Lyndon Limestone	-0.591343	-7.60605
227.06	Muav	Rampart Cave	-0.363712	-6.98873
228.56	Muav	Rampart Cave	-0.813196	-7.99308
230.06	Muav	Rampart Cave	-0.570048	-8.01166
231.56	Muav	Rampart Cave	-0.405708	-8.10637
233.06	Muav	Rampart Cave	-0.0367832	-6.73083
234.56	Muav	Rampart Cave	-0.0361669	-6.76875
236.06	Muav	Rampart Cave	-0.533229	-8.88654
237.56	Muav	Rampart Cave	-0.353442	-9.05498
239.06	Muav	Rampart Cave	0.410408	-6.05581
240.56	Muav	Rampart Cave	0.0655681	-6.72764
242.06	Muav	Rampart Cave	-0.0436172	-8.40734
243.56	Muav	Rampart Cave	0.237446	-3.0255
245.06	Muav	Rampart Cave	0.437923	-2.1124
246.56	Muav	Rampart Cave	0.427187	-2.70344
248.06	Muav	Rampart Cave	0.293535	-3.29004
249.56	Muav	Rampart Cave	0.616742	-3.4017
251.06	Muav	Rampart Cave	0.481044	-1.91643
252.56	Muav	Rampart Cave	0.294696	-2.57449
254.06	Muav	Rampart Cave	0.475232	-3.49469
255.56	Muav	Rampart Cave	0.441166	-4.22384
257.06	Muav	Rampart Cave	0.146502	-3.70557
258.56	Muav	Rampart Cave	-0.010138	-8.07094
260.06	Muav	Rampart Cave	-0.548565	-6.73617
261.56	Muav	Rampart Cave	0.195095	-5.52927
263.06	Muav	Rampart Cave	0.111686	-4.60392
264.56	Muav	Rampart Cave	0.040657	-7.03623
266.06	Muav	Rampart Cave	0.203201	-6.46714
267.56	Muav	Rampart Cave	2.1e-05	-5.91875
269.06	Muav	Rampart Cave	0.162565	-8.33997
270.56	Muav	Rampart Cave	-0.355544	-7.46047
272.06	Muav	Sanup Plateau	1.37149	-6.01187
273.56	Muav	Sanup Plateau	-0.426657	-7.26387
275.06	Muav	Sanup Plateau	-0.030456	-8.32962
276.56	Muav	Sanup Plateau	-0.00786893	-7.4693
278.06	Muav	Sanup Plateau	0.233155	-7.62194
279.56	Muav	Sanup Plateau	0.242486	-7.18135
281.06	Muav	Sanup Plateau	0.315235	-7.19339
282.56	Muav	Sanup Plateau	0.152676	-5.33774
284.06	Muav	Sanup Plateau	0.392219	-6.27327
285.56	Muav	Sanup Plateau	0.117053	-7.29896
287.06	Muav	Sanup Plateau	-0.0280141	-5.41888
288.56	Muav	Sanup Plateau	-0.150436	-6.61959
290.06	Muav	Sanup Plateau	0.0835554	-6.34442
291.56	Muav	Sanup Plateau	-0.033915	-6.76982
293.06	Muav	Sanup Plateau	-0.189755	-7.83432
294.56	Muav	Sanup Plateau	0.0517436	-6.79708
296.06	Muav	Sanup Plateau	-0.0733252	-8.09771
297.56	Muav	Sanup Plateau	-0.359115	-7.16295
299.06	Muav	Sanup Plateau	0.026789	-6.40546
300.56	Muav	Sanup Plateau	-0.77019	-7.56778
302.06	Muav	Sanup Plateau	-1.06867	-8.01173
303.56	Muav	Sanup Plateau	-0.92184	-7.54782
305.06	Muav	Spencer Canyon	-1.4304	-7.62888
306.56	Muav	Spencer Canyon	-2.02853	-9.90477
308.06	Muav	Spencer Canyon	-1.26169	-7.76096
309.56	Muav	Spencer Canyon	-0.95121	-7.07584
311.06	Muav	Spencer Canyon	-1.31549	-7.0517
312.56	Muav	Spencer Canyon	-0.953765	-7.21341
314.06	Muav	Spencer Canyon	-0.612981	-2.90391
315.56	Muav	Spencer Canyon	-0.618591	-2.60852
317.06	Muav	Spencer Canyon	-0.726084	-1.97576
318.56	Muav	Spencer Canyon	-0.231776	-2.84782
320.06	Muav	Spencer Canyon	-0.18628	-0.652285
321.56	Muav	Spencer Canyon	-0.582464	-0.660959
323.06	Muav	Spencer Canyon	-0.409996	-1.75663
324.56	Muav	Spencer Canyon	-0.0700422	-1.40729
326.06	Muav	Peach Springs	-0.207953	-4.48463
327.56	Muav	Peach Springs	-0.631378	-4.59878
329.06	Muav	Peach Springs	-0.255464	-4.02226
330.56	Muav	Peach Springs	-0.593722	-3.69733
332.06	Muav	Peach Springs	-0.528427	-4.7568
333.56	Muav	Peach Springs	-0.406363	-3.86554
335.06	Muav	Peach Springs	-0.517645	-3.79683
336.56	Muav	Peach Springs	-0.480541	-4.24943
338.06	Muav	Peach Springs	-0.933375	-4.81851
339.56	Muav	Peach Springs	-0.877764	-4.62855
341.06	Muav	Peach Springs	-0.612141	-4.31487
342.56	Muav	Peach Springs	-0.974522	-4.80436
344.06	Muav	Peach Springs	-1.40279	-4.64514
345.56	Muav	Peach Springs	-1.12365	-4.2722
347.06	Muav	Peach Springs	-0.926198	-4.43476
348.56	Muav	Peach Springs	-1.13997	-4.7869
350.06	Muav	Peach Springs	-1.21982	-4.00765
351.56	Muav	Peach Springs	-1.26478	-5.15089
353.06	Muav	Peach Springs	-1.09903	-5.18272
354.56	Muav	Peach Springs	-1.02441	-4.67384
356.06	Muav	Peach Springs	-1.13228	-4.99204
357.56	Muav	Peach Springs	-1.10074	-4.22738
359.06	Muav	Peach Springs	-1.19105	-5.01375
360.56	Muav	Peach Springs	-1.06921	-3.6208
362.06	Muav	Peach Springs	-1.62051	-3.87718
363.56	Muav	Peach Springs	-1.22176	-4.47137
365.06	Muav	Peach Springs	-1.44293	-3.76085
366.56	Muav	Peach Springs	-1.26202	-4.04794
368.06	Muav	Peach Springs	-1.29894	-3.49341
369.56	Muav	Peach Springs	-1.1764	-4.1305
372.56	Muav	Peach Springs	-0.857386	-4.14932
374.06	Muav	Peach Springs	-1.1366	-4.46195
375.56	Muav	Peach Springs	-1.07603	-4.59805
377.06	Muav	Peach Springs	-0.994687	-4.21677
378.56	Muav	Peach Springs	-1.20391	-3.83959
380.06	Muav	Peach Springs	-1.55898	-4.19774
381.56	Muav	Peach Springs	-1.60345	-4.06298
383.06	Muav	Peach Springs	-1.70773	-4.11331
384.56	Muav	Peach Springs	-1.97184	-4.59697
386.06	Muav	Peach Springs	-1.5803	-4.32081
387.56	Muav	Peach Springs	-1.43324	-4.24427
389.06	Muav	Peach Springs	-1.51523	-4.18313
390.56	Muav	Peach Springs	-1.02728	-3.8446
392.06	Muav	Kanab & Gateway	-1.58458	-4.16229
393.56	Muav	Kanab & Gateway	-1.88046	-4.02257
395.06	Muav	Kanab & Gateway	-1.29986	-5.3793
396.56	Muav	Kanab & Gateway	-1.47741	-5.47127
398.06	Muav	Kanab & Gateway	-1.4463	-1.9087
399.56	Muav	Kanab & Gateway	-1.35946	-4.61585
401.06	Muav	Kanab & Gateway	-1.51534	-1.88726
402.56	Muav	Kanab & Gateway	-1.36062	-5.01245
404.06	Muav	Kanab & Gateway	-1.7283	-4.32384
405.56	Muav	Kanab & Gateway	-1.49423	-4.45208
407.06	Muav	Kanab & Gateway	-1.72376	-4.95295
408.56	Muav	Kanab & Gateway	-1.70275	-4.63236
410.06	Muav	Kanab & Gateway	-1.43066	-4.53598
411.56	Muav	Kanab & Gateway	-1.59235	-4.98279
413.06	Muav	Kanab & Gateway	-1.88172	-4.64933
414.56	Muav	Kanab & Gateway	-1.82608	-5.24393
416.06	Muav	Kanab & Gateway	-1.75542	-5.08701
417.56	Muav	Kanab & Gateway	-1.94959	-4.56154
419.06	Muav	Kanab & Gateway	-1.78042	-4.72394
420.56	Muav	Kanab & Gateway	-1.60534	-4.93831
422.06	Muav	Kanab & Gateway	-2.1442	-4.79362
423.56	Muav	Kanab & Gateway	-2.02231	-5.0596
425.06	Muav	Kanab & Gateway	-1.97558	-4.99208
426.56	Muav	Kanab & Gateway	-2.04125	-4.44357
429.56	Muav	Kanab & Gateway	-1.89977	-4.06289
431.06	Muav	Kanab & Gateway	-1.66981	-4.2281
432.56	Muav	Kanab & Gateway	-1.60643	-4.5135
434.06	Muav	Kanab & Gateway	-1.43287	-4.4291
435.56	Muav	Kanab & Gateway	-2.3259	-4.75224
437.06	Muav	Kanab & Gateway	-2.21807	-4.26692
438.56	Muav	Kanab & Gateway	0.187861	-6.83661
440.06	Muav	Kanab & Gateway	0.0907557	-1.34596
441.56	Muav	Kanab & Gateway	-0.0985307	-0.13099
443.06	Muav	Havasu	0.362384	-0.634552
444.56	Muav	Havasu	0.282193	-1.14458
446.06	Muav	Havasu	0.736745	-5.06304
447.56	Muav	Havasu	0.199175	-2.37277
449.06	Muav	Havasu	0.221033	-1.9656
450.56	Muav	Havasu	0.456848	-3.85498
452.06	Muav	Havasu	0.185638	-2.57133
453.56	Muav	Havasu	-0.158481	-3.64971
455.06	Muav	Havasu	-0.379807	-1.84695
456.56	Muav	Havasu	0.118263	-5.08561
458.06	Muav	Havasu	0.138014	-4.14377
459.56	Muav	Havasu	-0.302036	-3.51591
461.06	Muav	Havasu	-0.116909	-4.09239
462.56	Muav	Havasu	0.229145	-3.87887
464.06	Muav	Havasu	-0.750274	-5.28584
465.56	Muav	Havasu	-0.378175	-4.62856
467.06	Muav	Havasu	-0.401325	-4.3298
470.06	Muav	Havasu	-0.503597	-4.78329
471.56	Muav	Havasu	0.0190807	-4.53244
473.06	FMD	-	-0.473625	-4.6496
474.56	FMD	-	-0.510426	-4.55485
476.06	FMD	-	-1.5798	-4.25266
477.56	FMD	-	-1.61579	-4.83411
479.06	FMD	-	-1.40689	-4.06038
480.56	FMD	-	-2.69496	-4.28117
482.06	FMD	-	-1.98936	-4.3856
483.56	FMD	-	-1.02167	-4.5172
485.06	FMD	-	-1.52429	-4.11012
486.56	FMD	-	-2.07418	-2.47811
488.06	FMD	-	-1.13589	-3.1555
489.56	FMD	-	-0.855523	-4.09565
491.06	FMD	-	-0.654733	-3.66323
492.56	FMD	-	-1.50744	-4.06397
494.06	FMD	-	-1.21213	-4.14556
495.56	FMD	-	-1.81898	-3.94403
497.06	FMD	-	-2.51313	-1.20484
498.56	FMD	-	-2.19432	-3.39203
500.06	FMD	-	-1.90697	-4.56322
501.56	FMD	-	-1.49714	-3.50877
503.06	FMD	-	-1.00709	-2.9551
504.56	FMD	-	-0.980724	-3.0126
506.06	FMD	-	-1.06952	-3.63452
507.56	FMD	-	-0.0807417	-0.124737
509.06	FMD	-	-0.267734	0.888283
510.56	FMD	-	-0.718973	-1.28649
512.06	FMD	-	-0.653125	-4.04795
513.56	FMD	-	-0.435039	-2.28924
515.06	FMD	-	-0.821608	-4.1558
516.56	FMD	-	-0.345764	-2.78981
518.06	FMD	-	-0.40222	-2.90146
519.56	FMD	-	-0.994788	-2.96845
521.06	FMD	-	-1.3178	-3.12356
522.56	FMD	-	-0.845225	-3.33652
524.06	FMD	-	-1.35083	-3.06053
525.56	FMD	-	-1.03309	-3.67401
527.06	FMD	-	-0.922586	-3.43806
528.56	FMD	-	-0.530464	-0.381577
530.06	FMD	-	-0.606924	-1.10345
531.56	FMD	-	-0.980328	-1.32051
533.06	FMD	-	-0.699776	-3.49962
534.56	FMD	-	-0.486746	-3.72972
536.06	FMD	-	-0.511688	-4.32222
537.56	FMD	-	-0.476404	-4.35336
539.06	FMD	-	-0.226748	-4.35402
540.56	FMD	-	-0.447013	-4.78147
542.06	FMD	-	-0.404268	-4.08998
543.56	FMD	-	-0.40933	-3.5638
545.06	FMD	-	-0.0885657	-2.73786
546.56	FMD	-	-0.669782	-3.07329
548.06	FMD	-	-0.621481	-4.15126
549.56	FMD	-	-0.0821437	-4.23993
551.06	FMD	-	-0.540959	-3.72305
552.56	FMD	-	-0.42817	-2.43427
554.06	FMD	-	0.192411	-4.12983
555.56	FMD	-	0.0261267	-4.29499
557.06	FMD	-	0.188246	-4.17488
558.56	FMD	-	0.199238	-3.47203
560.06	FMD	-	-0.350254	-4.28651
561.56	FMD	-	-0.324463	-4.11278
563.06	FMD	-	-0.685349	-5.0587
564.56	FMD	-	-0.36831	-3.98461
566.06	FMD	-	0.0303722	-4.21297
567.56	FMD	-	0.0925067	-4.41419
569.06	FMD	-	-0.164509	-4.0784
570.56	FMD	-	-0.0385662	-3.9287
572.06	FMD	-	0.151345	-4.56517
573.56	FMD	-	0.667796	-4.004
575.06	FMD	-	0.580093	-3.92607
576.56	FMD	-	0.9354	-4.27373
578.06	FMD	-	0.591492	-4.18373
579.56	FMD	-	0.0699236	-4.88684
581.06	FMD	-	0.230889	-4.0128
582.56	FMD	-	-0.106332	-3.41906
584.06	FMD	-	-0.127877	-3.46582
585.56	FMD	-	-0.454152	-3.96023
587.06	FMD	-	-0.217438	-3.11235
588.56	FMD	-	-0.984639	-3.71681
590.06	FMD	-	-0.744777	-3.38871
591.56	FMD	-	-0.620311	-4.33792
593.06	FMD	-	-0.427527	-3.72776
594.56	FMD	-	0.0706859	-3.73092
596.06	FMD	-	0.0955157	-3.8468
597.56	FMD	-	-0.0302446	-4.21154
599.06	FMD	-	-0.0403085	-4.36069
602.06	FMD	-	-0.0157061	-4.4089
603.56	FMD	-	-0.254085	-3.49115
605.06	FMD	-	-0.53926	-3.82554
606.56	FMD	-	0.0615545	-4.18063
608.06	FMD	-	0.0870715	-4.29475
609.56	FMD	-	0.207376	-3.61744
611.06	FMD	-	0.151634	-3.73444
612.56	FMD	-	0.4464	-3.7669
614.06	FMD	-	0.258765	-4.74723
615.56	FMD	-	-0.238774	-4.11286
617.06	FMD	-	-0.0288159	-2.67823
618.56	FMD	-	-1.21503	-3.52947
620.06	FMD	-	-1.07964	-2.92399
621.56	FMD	-	-1.1255	-2.83682
623.06	FMD	-	-0.810341	-2.1179
624.56	FMD	-	-0.161285	-3.74709
626.06	FMD	-	-0.32734	-4.3113
627.56	FMD	-	-0.709749	-4.1428
629.06	FMD	-	-0.529616	-3.90665
630.56	FMD	-	-0.892225	-3.5932
632.06	FMD	-	-1.53722	-3.61331
633.56	FMD	-	-0.757803	-4.07454
635.06	FMD	-	-1.22157	-3.26363
636.56	FMD	-	-1.33481	-5.18067
638.06	FMD	-	-0.816555	-3.06992
639.56	FMD	-	-1.61614	-3.632
641.06	FMD	-	-0.710398	-4.6648
642.56	FMD	-	-2.10195	-2.91315
644.06	FMD	-	-1.00554	-3.9212
645.56	FMD	-	-1.64874	-2.63839
647.06	FMD	-	-1.26975	-3.18751
648.56	FMD	-	-1.1798	-3.20513
650.06	FMD	-	-1.87372	-3.64152
651.56	FMD	-	-0.984639	-3.71681
653.06	FMD	-	-1.35122	-3.4639
654.56	FMD	-	-0.198894	-4.19291
656.06	FMD	-	-0.292513	-4.03139
657.56	FMD	-	-1.04693	-4.32583
659.06	FMD	-	-0.750902	-3.63435
660.56	FMD	-	-0.772927	-3.40709
662.06	FMD	-	-0.815709	-3.99866
663.56	FMD	-	-0.774429	-3.95191
665.06	FMD	-	-0.629675	-2.39331
666.56	FMD	-	0.122962	-2.8912
668.06	FMD	-	-0.7626	-4.62047
669.56	FMD	-	-0.6839	-3.85456
671.06	FMD	-	-0.777191	-3.8392
672.56	FMD	-	-0.404739	-4.56025
674.06	FMD	-	-0.544396	-4.02867
675.56	FMD	-	-0.295001	-4.36179
677.06	FMD	-	-0.287257	-3.63669
678.56	FMD	-	-0.0903487	-3.24299
680.06	FMD	-	-0.465713	-3.86226
681.56	FMD	-	-0.751176	-3.46438
683.06	FMD	-	-0.170626	-3.86204
684.56	FMD	-	-1.00823	-3.5233
686.06	FMD	-	-0.950525	-3.91413
687.56	FMD	-	-0.987317	-3.33884
689.06	FMD	-	-1.40222	-3.81621
690.56	FMD	-	-1.06929	-4.06576
692.06	FMD	-	-1.0688	-3.4913
693.56	FMD	-	-0.175574	-2.72294
695.06	FMD	-	-1.76284	-3.5134
696.56	FMD	-	-1.36564	-3.50434
698.06	FMD	-	-1.56676	-3.88342
699.56	FMD	-	-1.62297	-3.72501
701.06	FMD	-	-1.30909	-3.31046
702.56	FMD	-	-1.56441	-3.79663
704.06	FMD	-	-1.31241	-3.94948
705.56	FMD	-	-1.25369	-3.93439
707.06	FMD	-	-1.28355	-3.20237
708.56	FMD	-	-0.936594	-3.65709
710.06	FMD	-	-0.555603	-2.79831
711.56	FMD	-	-0.703172	-3.11852
713.06	FMD	-	-0.554708	-3.66762
714.56	FMD	-	-0.99157	-2.94392
716.06	FMD	-	-0.759244	-3.0379
717.56	FMD	-	-0.534698	-2.7334
719.06	FMD	-	-0.933253	-3.5322
720.56	FMD	-	-1.03911	-2.43238
722.06	FMD	-	-0.521584	-3.36847
723.56	FMD	-	-0.410785	-2.86679
725.06	FMD	-	-0.346694	-3.65118
726.56	FMD	-	0.356199	-1.54215
728.06	FMD	-	0.0986391	-2.44923
729.56	FMD	-	0.3904	-2.21843
731.06	FMD	-	0.652453	-4.14447
734.06	FMD	-	0.705962	-2.14951
735.56	FMD	-	0.400931	-3.30798
737.06	FMD	-	0.704866	-1.84449
738.56	FMD	-	0.806961	-3.56849
740.06	FMD	-	0.469052	-2.5947
741.56	FMD	-	0.817225	-2.50782
743.06	FMD	-	0.813124	-3.87387
744.56	FMD	-	0.545135	-2.62167
746.06	FMD	-	0.370225	-3.07053
747.56	FMD	-	0.437419	-2.98397
749.06	FMD	-	0.72454	-1.52607
750.56	FMD	-	0.615608	-1.81387
752.06	FMD	-	0.594543	-1.78668
753.56	FMD	-	0.683298	-2.29944
755.06	FMD	-	0.645727	-1.58836
756.56	FMD	-	0.364188	-2.06045
758.06	FMD	-	0.820187	-1.56279
759.56	FMD	-	0.846841	-0.0317105
761.06	FMD	-	1.14269	-2.00423
762.56	FMD	-	1.82094	-3.15965
764.06	FMD	-	1.62	-2.14781
765.56	FMD	-	1.74147	-2.52579
767.06	FMD	-	2.41577	-2.79037
768.56	Nopah	Dunderberg	3.49162	-2.5236
771.26	Nopah	Dunderberg	3.09912	-3.51812
773.76	Nopah	Dunderberg	2.00046	-4.14862
775.26	Nopah	Dunderberg	2.66205	-3.3357
776.76	Nopah	Dunderberg	2.77762	-3.17291
778.26	Nopah	Dunderberg	2.36058	-3.38411
779.76	Nopah	Halfpint-Smoky	1.95571	-4.23017
781.26	Nopah	Halfpint-Smoky	1.92037	-3.79335
782.76	Nopah	Halfpint-Smoky	1.58783	-4.40874
784.26	Nopah	Halfpint-Smoky	1.59781	-4.23177
785.76	Nopah	Halfpint-Smoky	1.20419	-3.47575
787.26	Nopah	Halfpint-Smoky	1.74477	-3.97043
790.76	MtnSpr-Sultan	-	-0.700195	-3.06202
792.26	MtnSpr-Sultan	-	0.529688	-3.68752
793.76	MtnSpr-Sultan	-	0.0915733	-5.10643
795.26	MtnSpr-Sultan	-	-0.290536	-3.95304
796.76	MtnSpr-Sultan	-	-0.133529	-5.57182
798.26	MtnSpr-Sultan	-	-0.401567	-3.83272
799.76	MtnSpr-Sultan	-	-0.555966	-4.28028
801.26	MtnSpr-Sultan	-	-0.789278	-3.90152
802.76	MtnSpr-Sultan	-	-0.384156	-3.87704
804.26	MtnSpr-Sultan	-	-0.519294	-4.47816
805.76	MtnSpr-Sultan	-	-0.737056	-3.83505
