# Supplementary material
Source: publisher figshare collection journal article supplement (https://gsapubs.figshare.com/articles/dataset/_/21860211)
Supplement: Supplementary file 1 [file 1]

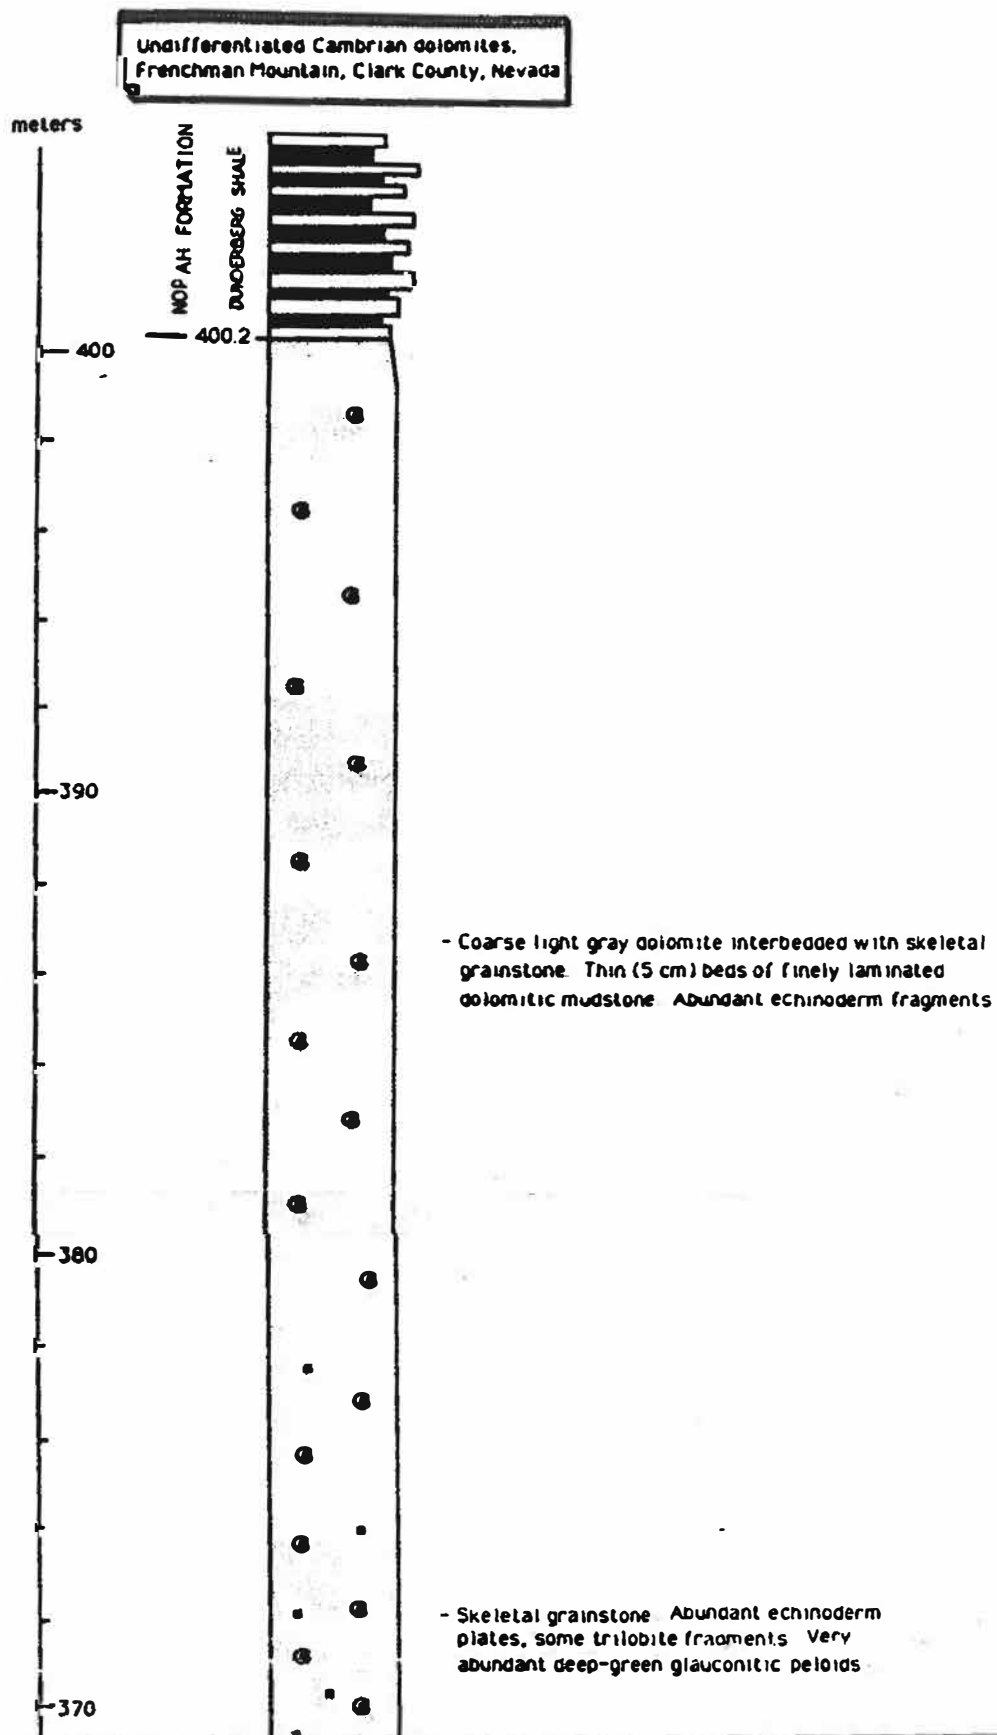

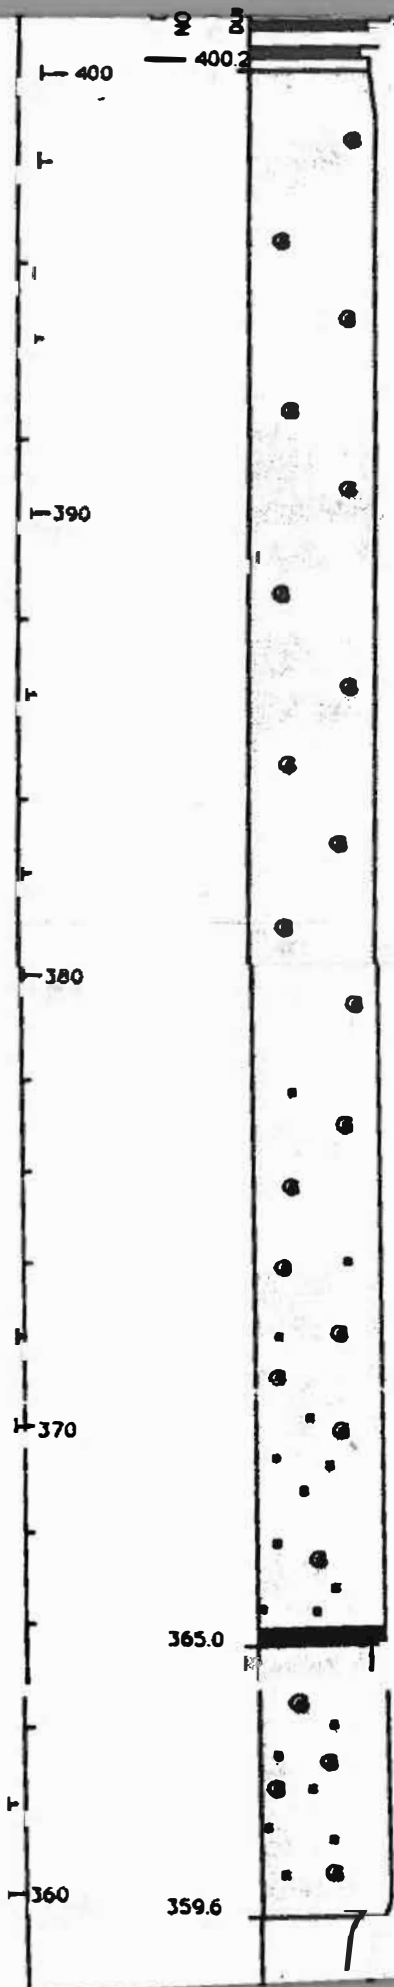

- Coarse light gray dolomite interbedded with skeletal grainstone. Thin (5 cm) beds of finely laminated dolomitic mudstone. Abundant echinoderm fragments

- Skeletal grainstone. Abundant echinoderm plates, some trilobite fragments. Very abundant deep-green glauconitic peloids

- remarkable greenish glauconitic layer with abundant black pyrite crystals

NON-CYCLIC INTERVAL

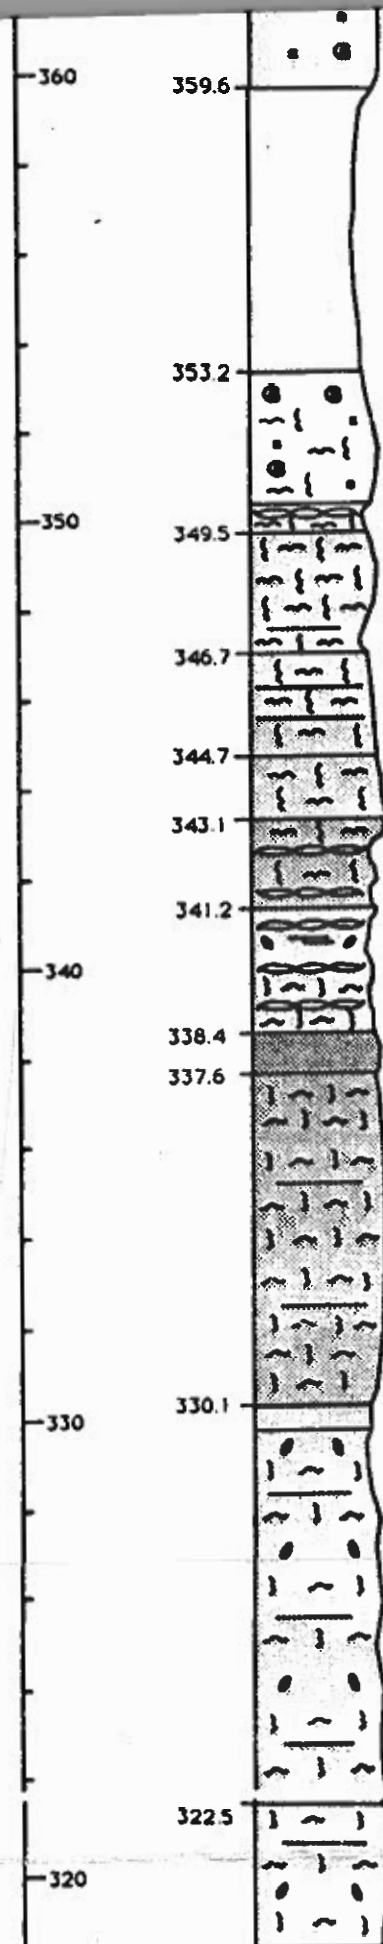

- generally covered interval  
finely laminated mudstone

# SEQUENCE BOUNDARY ZONE ?

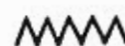

LHST

353.2

- light gray, dolomitic wackestone with  
some skeletal fragments and rare, partly  
dissolved glauconite peloids

350

349.5

- alternating thin nodular and mottled beds  
- burrow-mottled, non-bedded dolomite

346.7

- alternating thin nodular beds and thin  
burrow-mottled beds

344.7

- moderately bedded, burrow-mottled,  
coarse grained dolomite

343.1

- burrow-mottled, surfacic dolomite

341.2

- alternating layers of burrow-mottled  
dolomite with thin nodular beds

340

338.4

- homogeneous burrowed dolomite

337.6

- poorly-bedded, intensively burrowed dolomite

330

330.1

- poorly-bedded, intensively bioturbated  
dolomite with rare intraclastic  
grainstone layers

322.5

- same as above

320

EHST

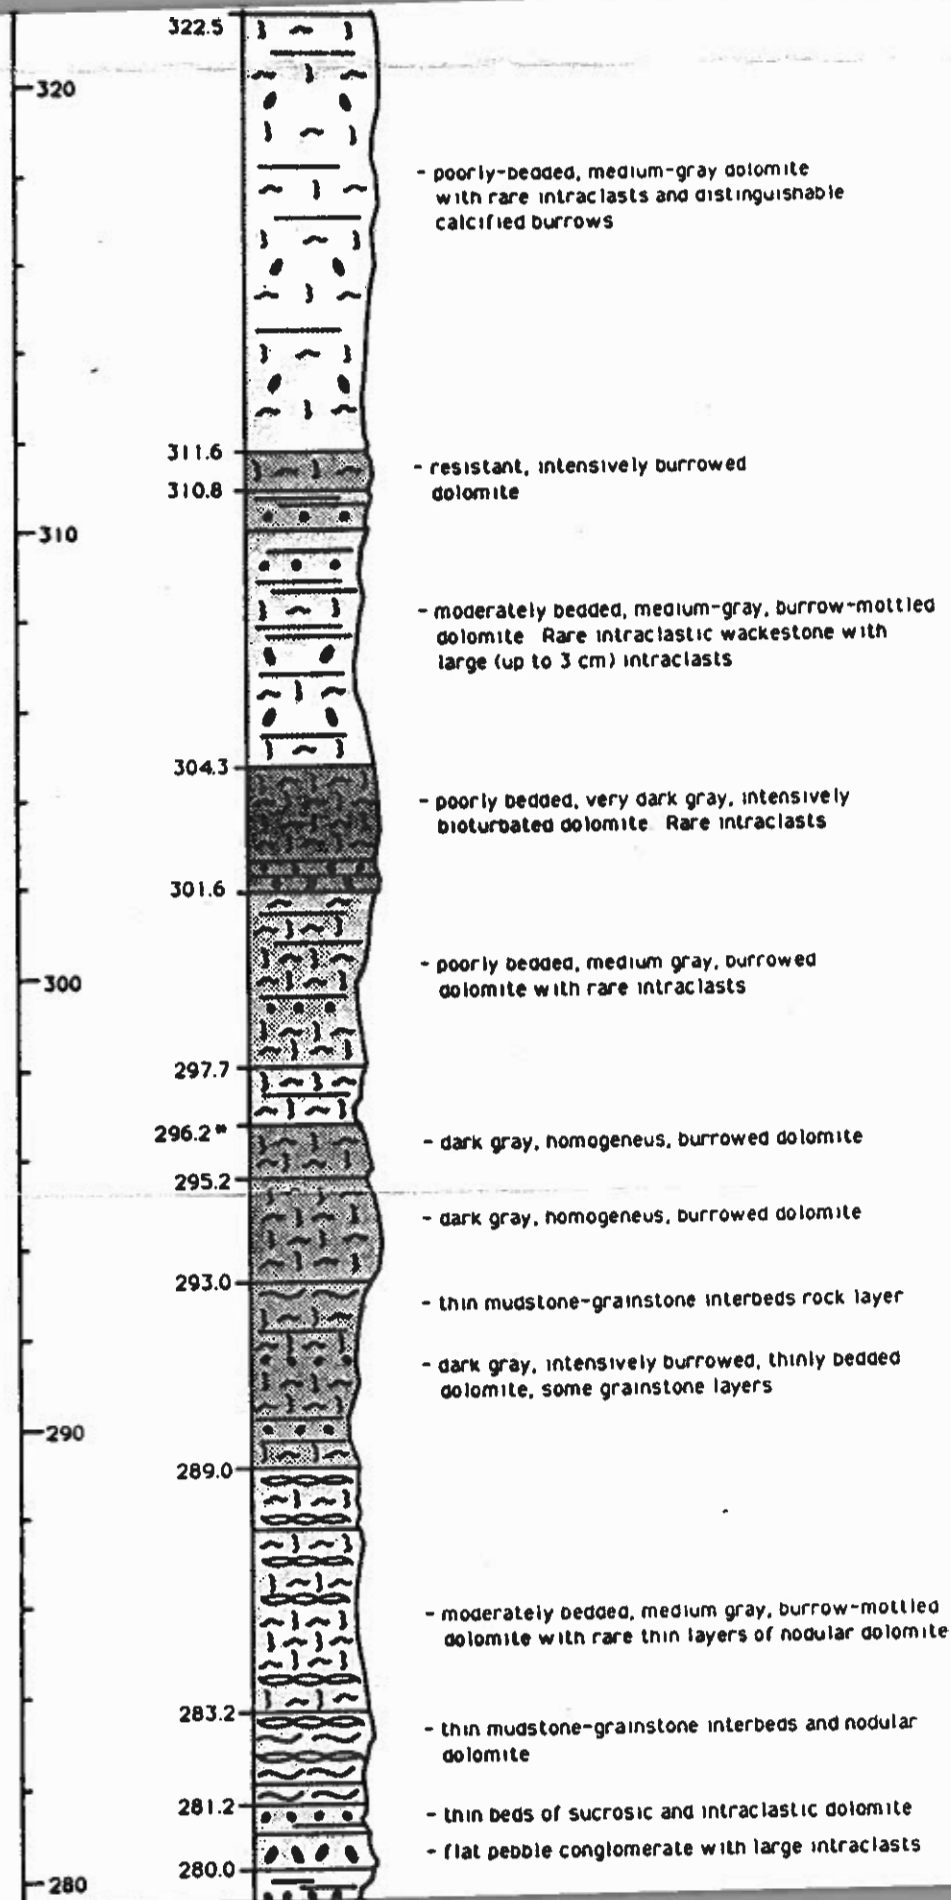

TST

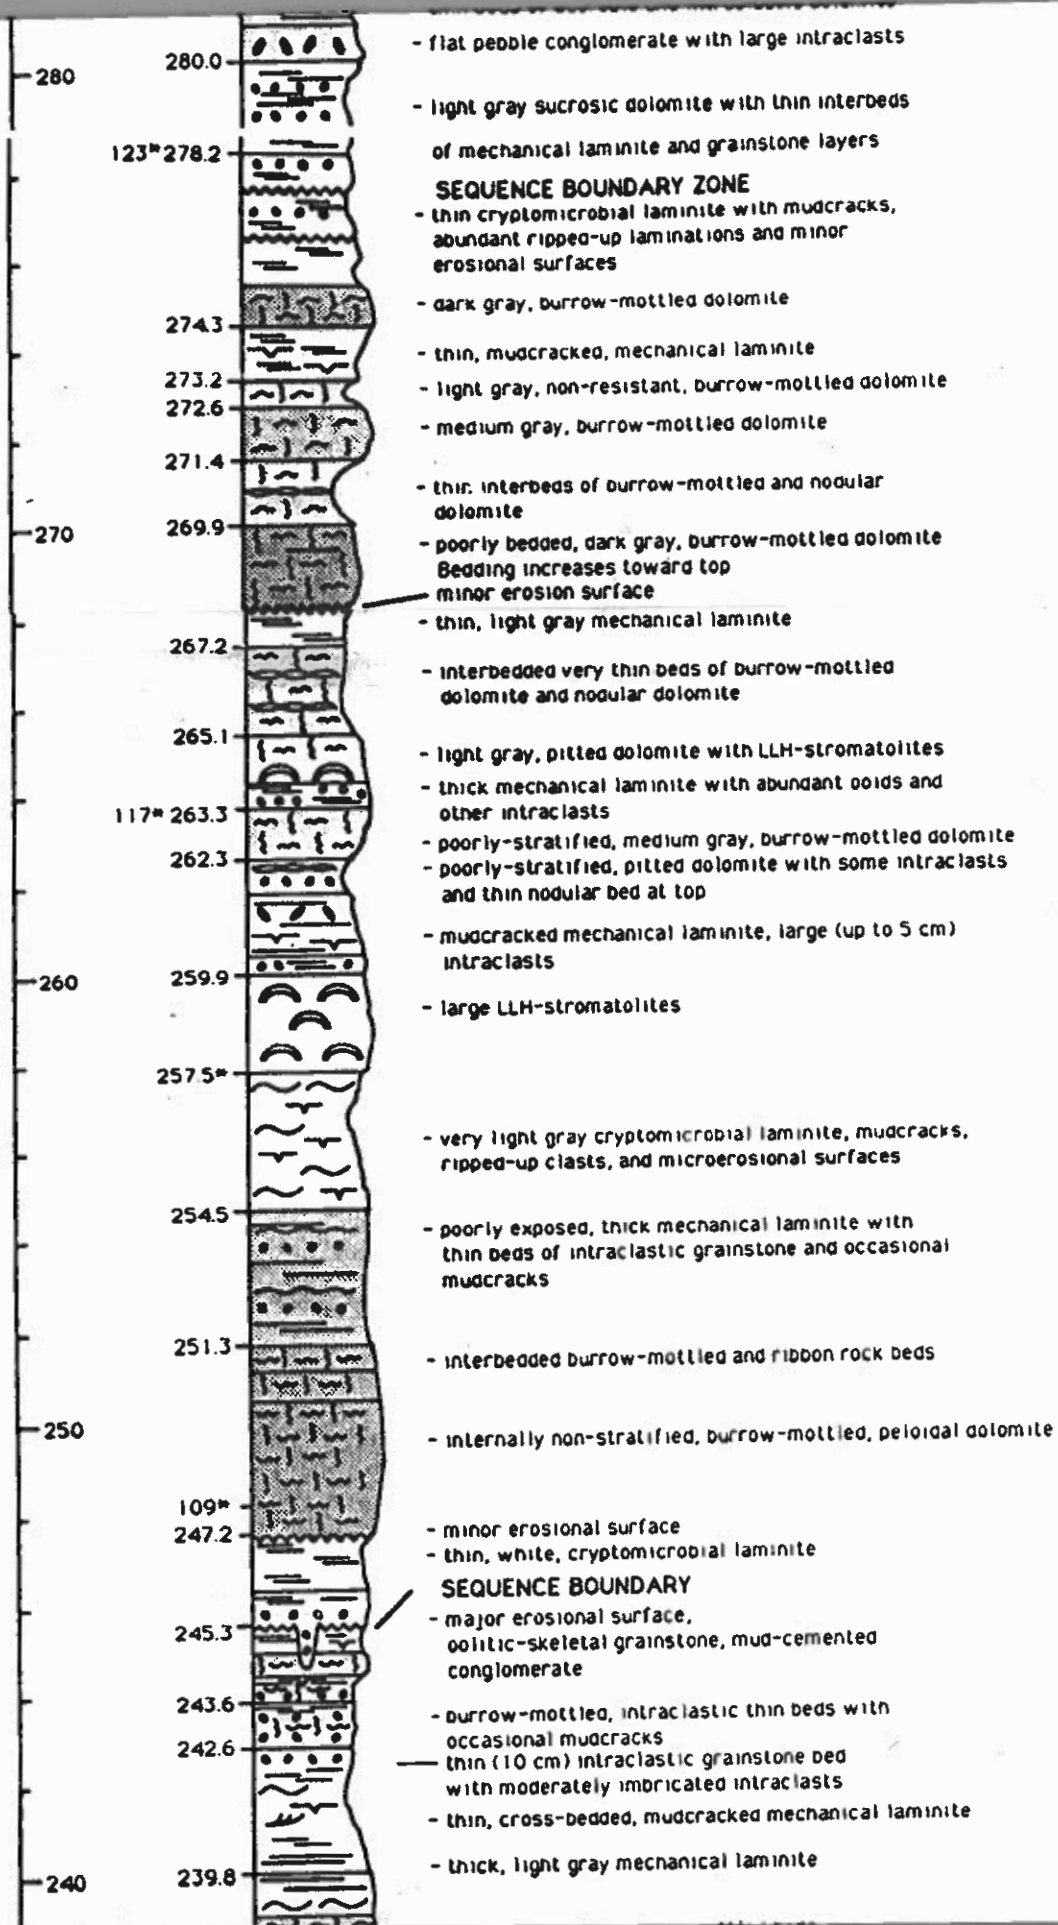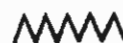

LHST

EHST

SEQUENCE 6

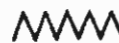

TST

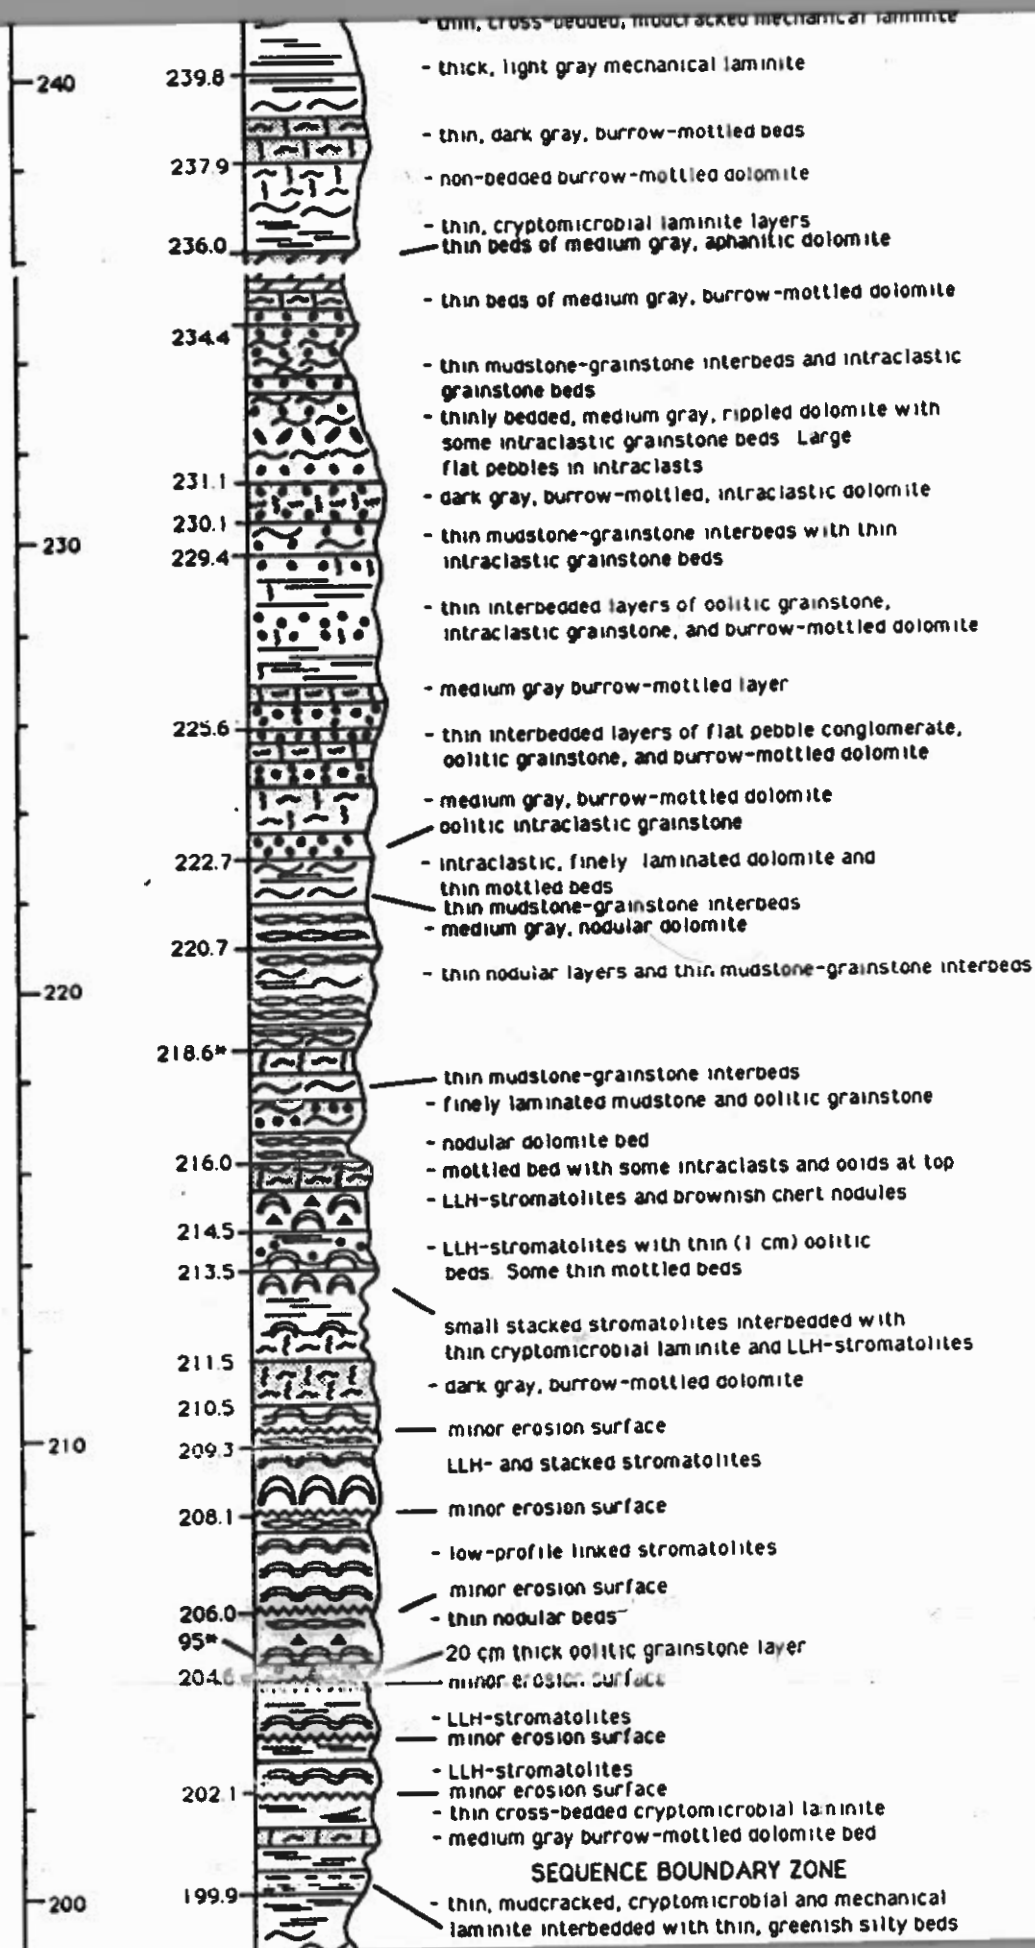

HST

SEQUENCE 5

TST

LHST

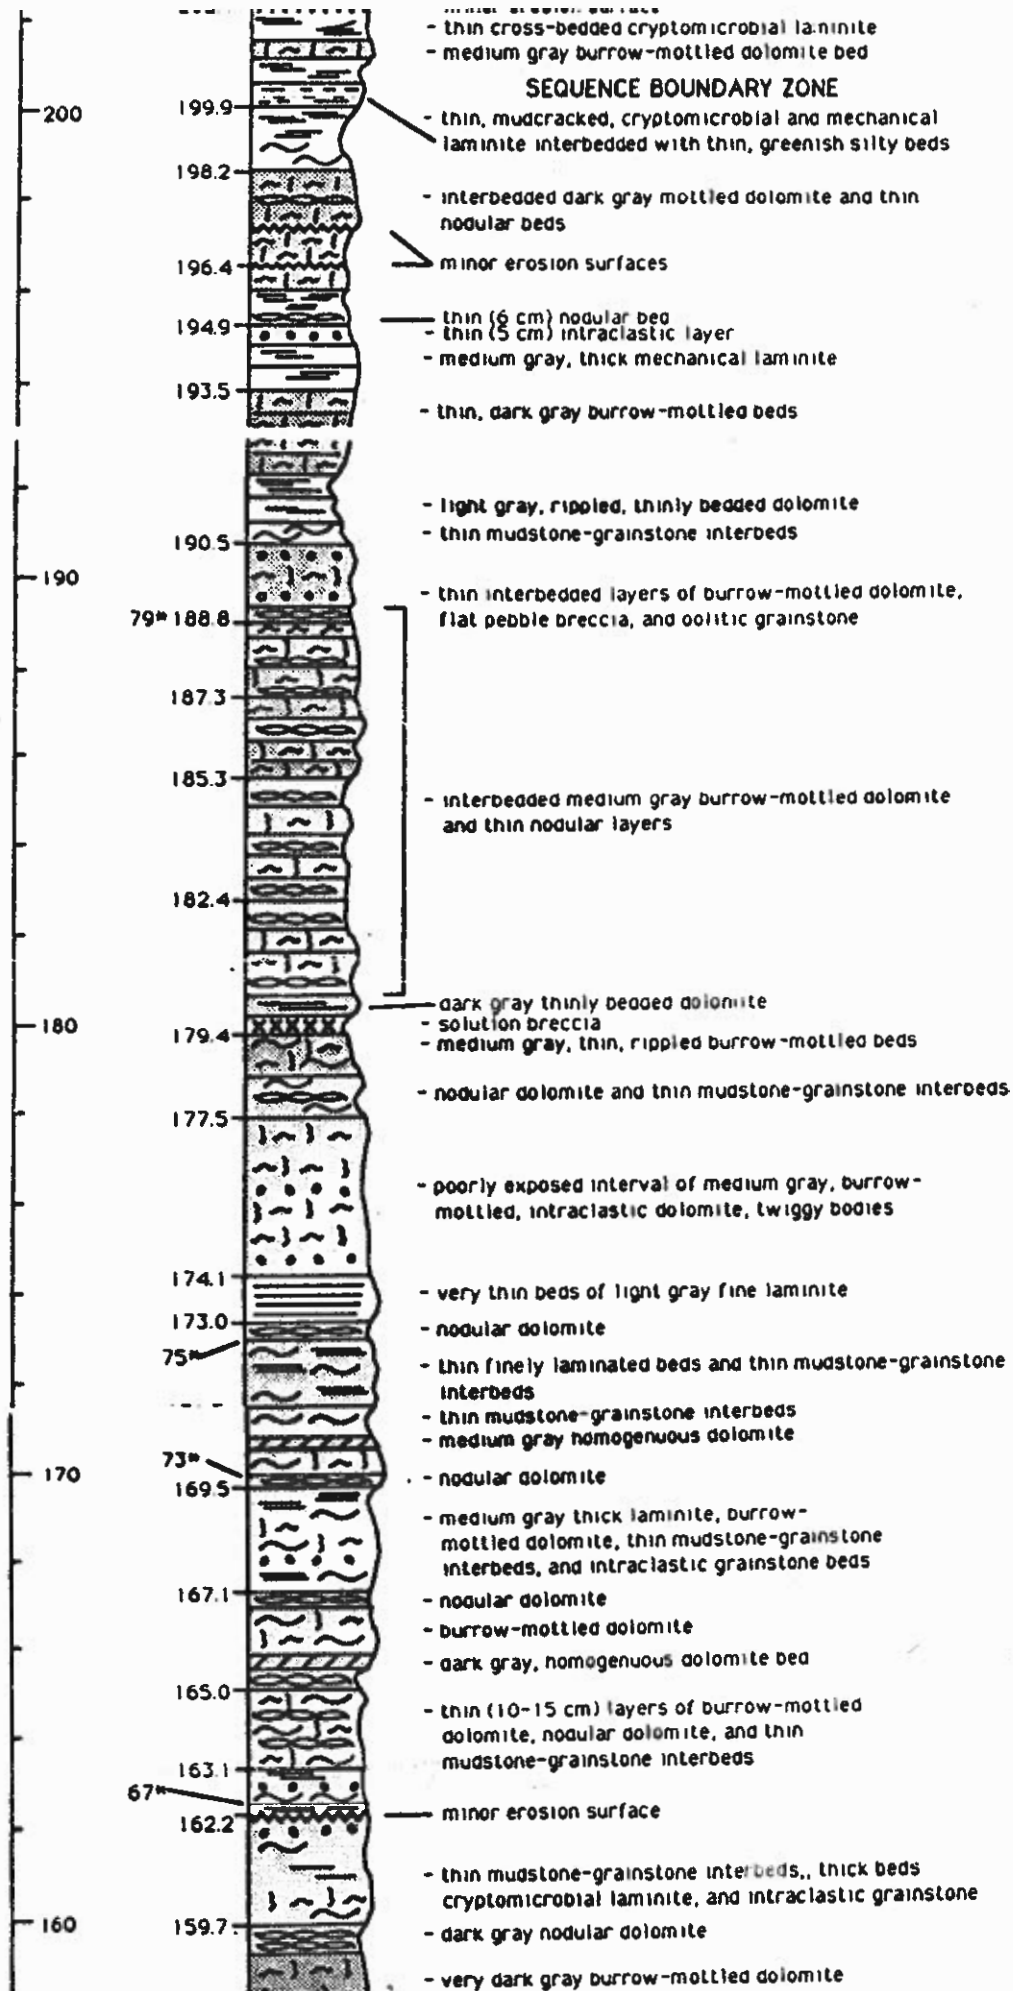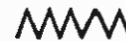

LHST

EHST

SEQUENCE 4

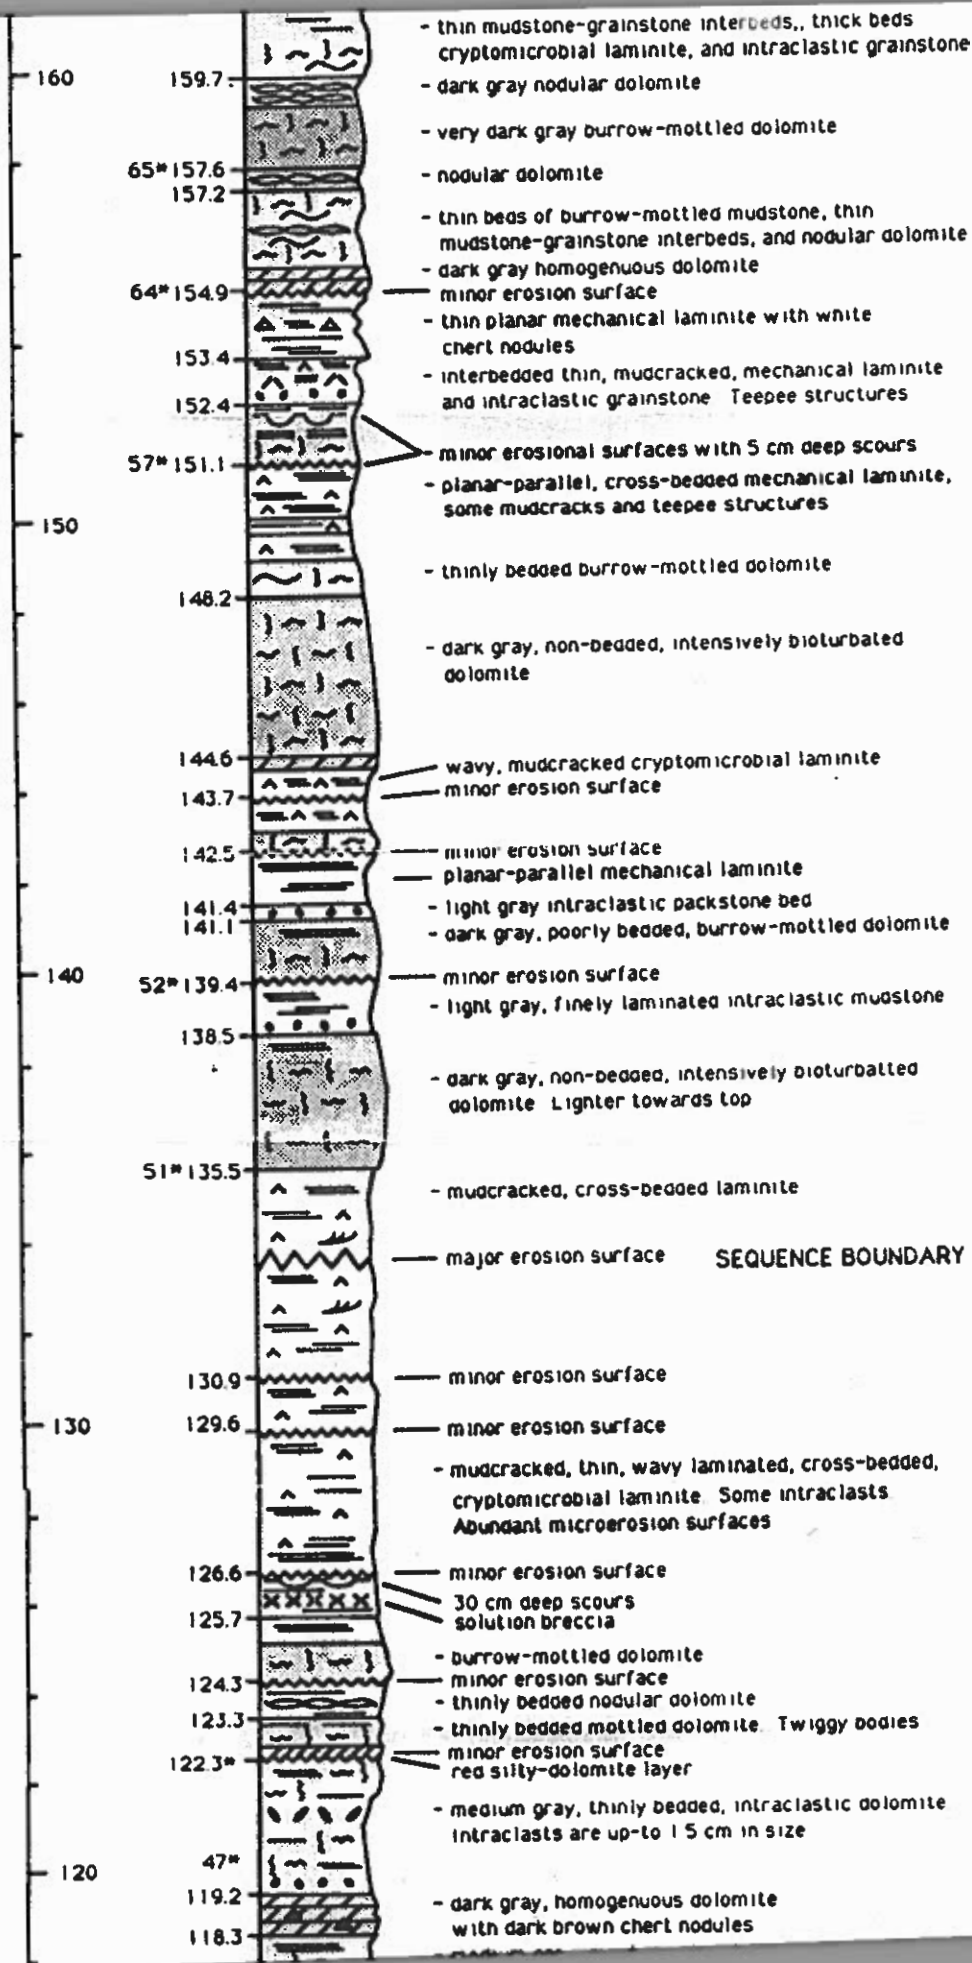

TST

HST



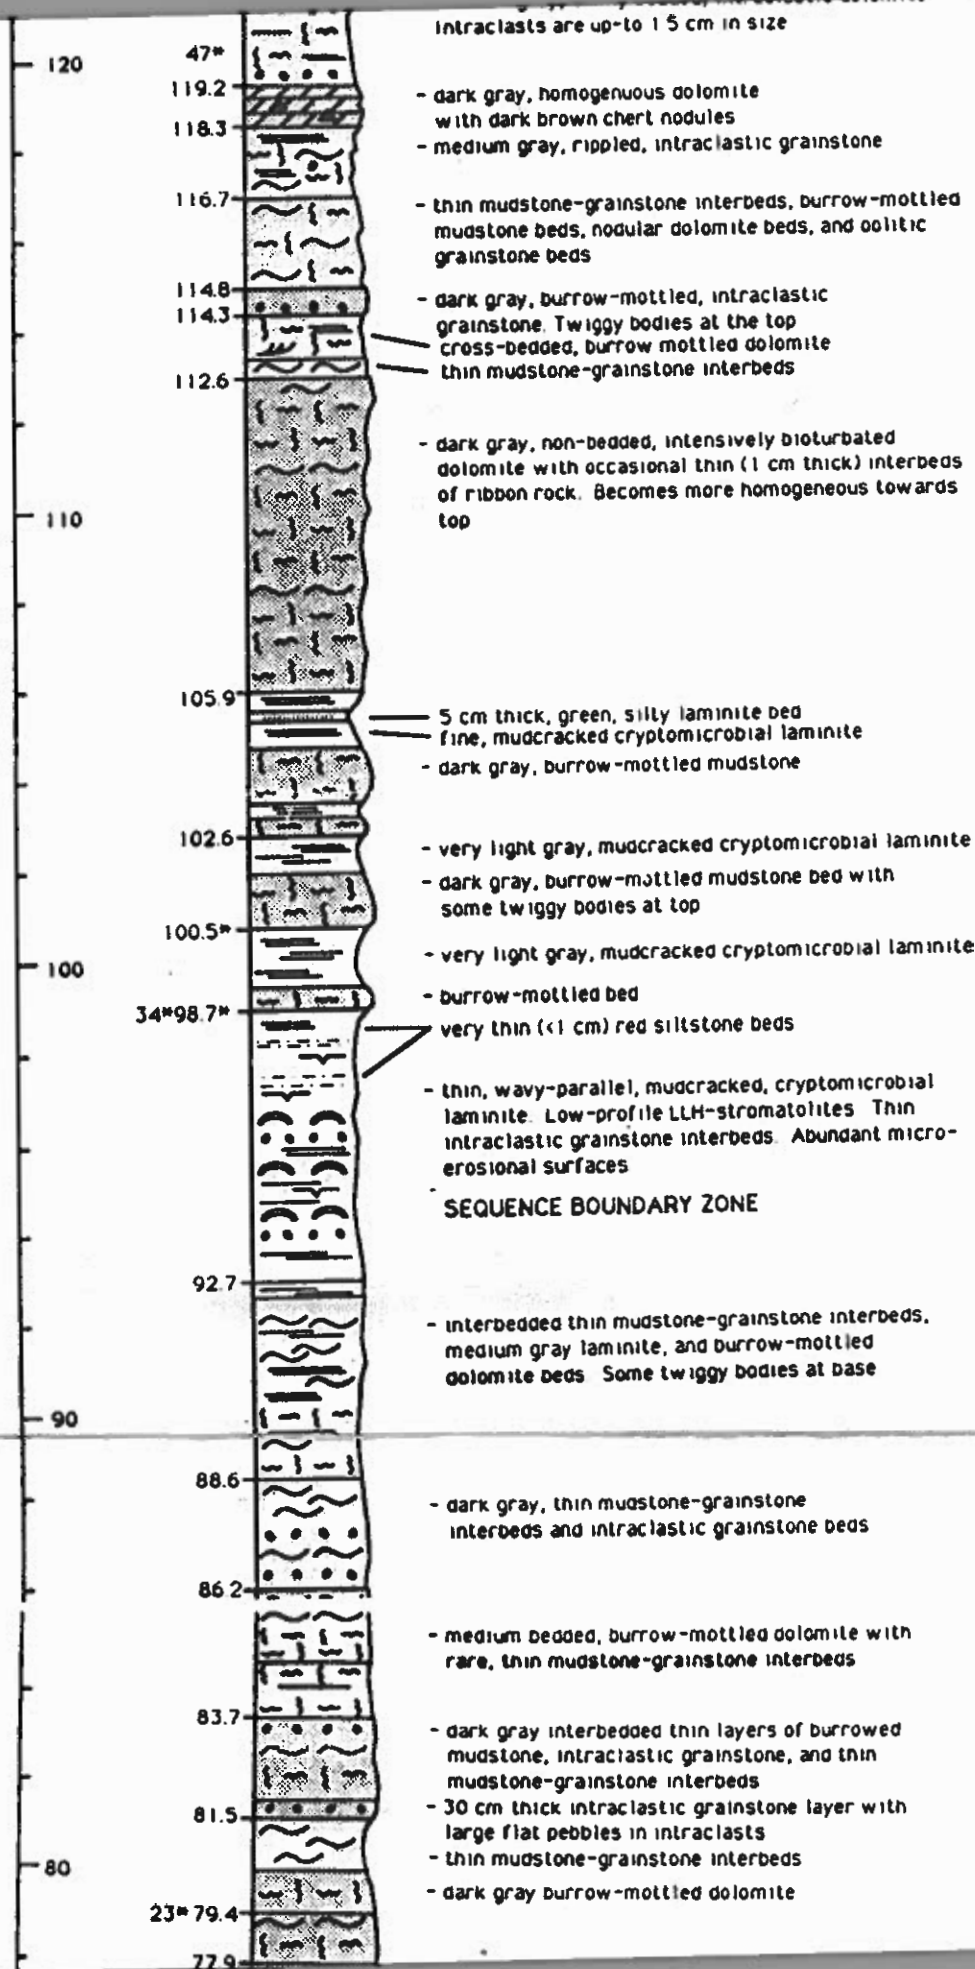

TST

SEQUENCE 3

HST

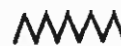

SEQUENCE BOUNDARY ZONE

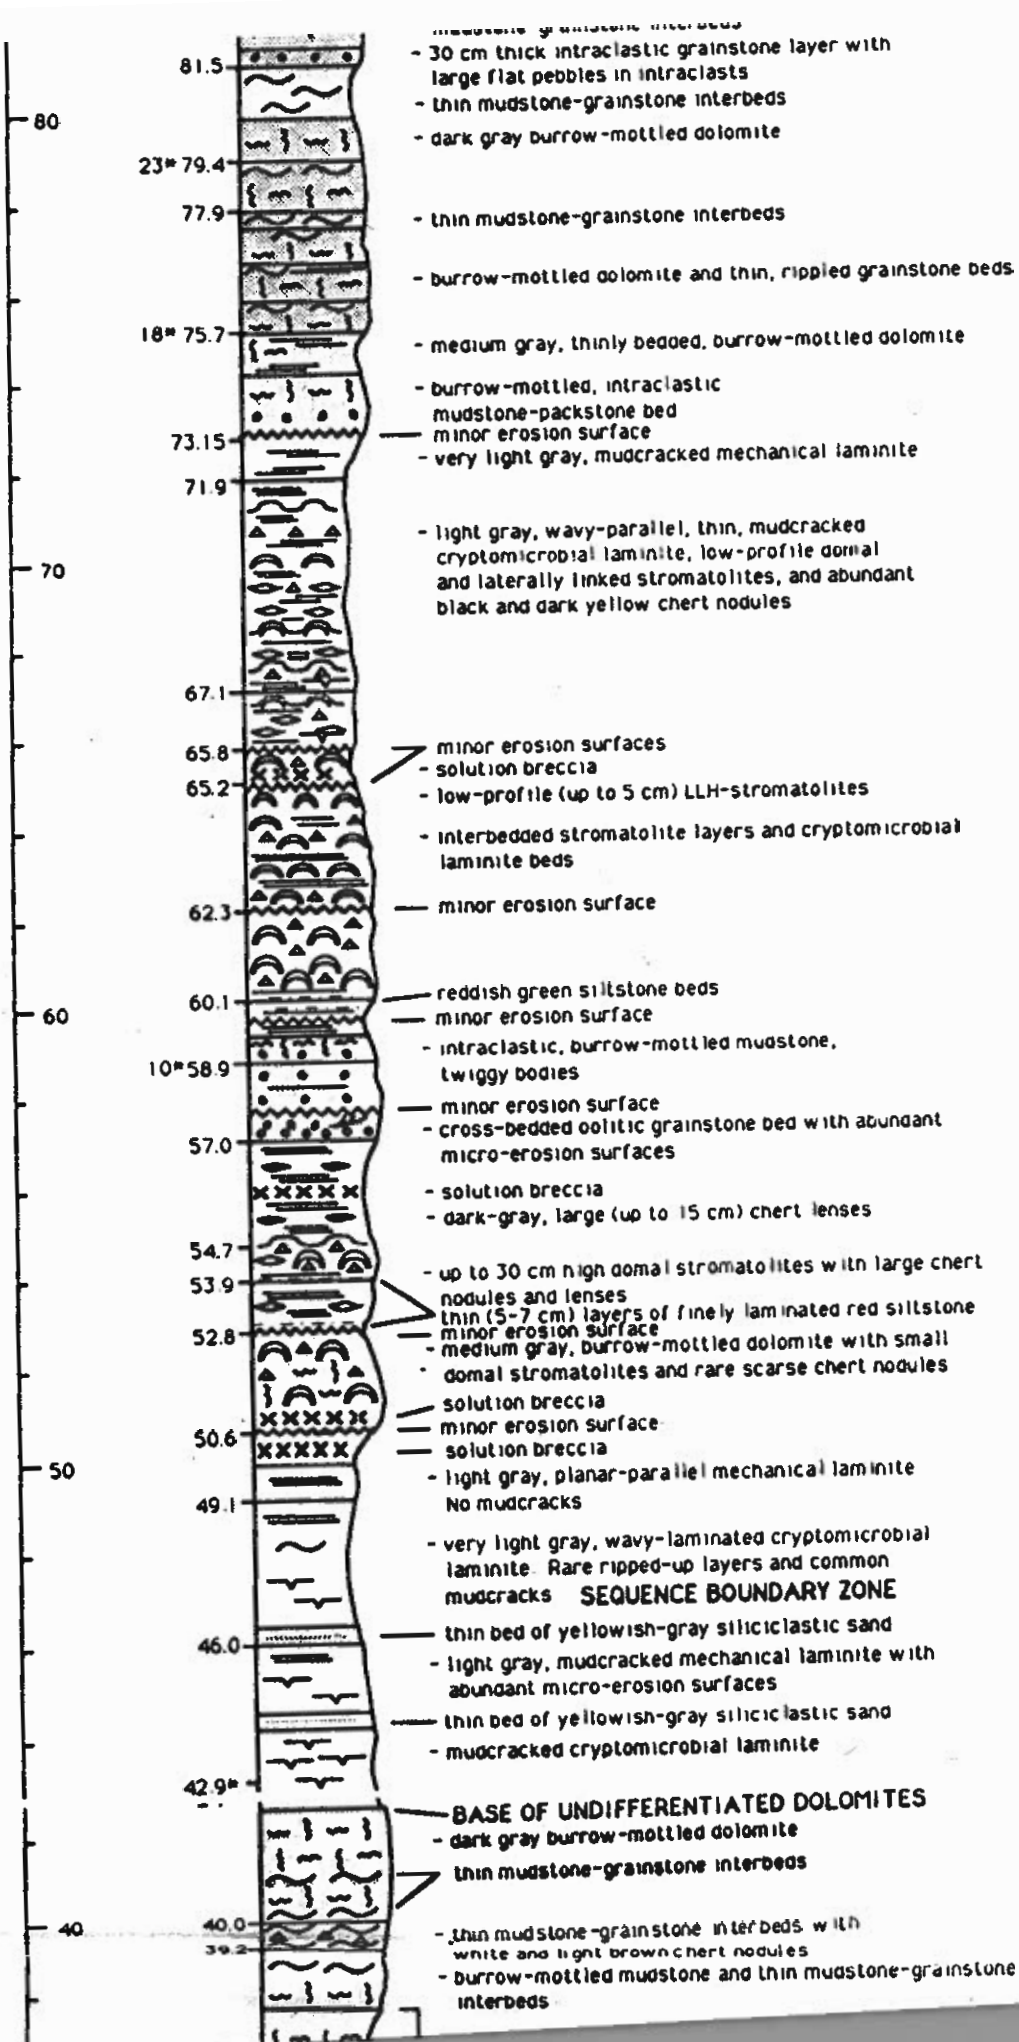

TST

SEQUENCE 2

LHST

EHST

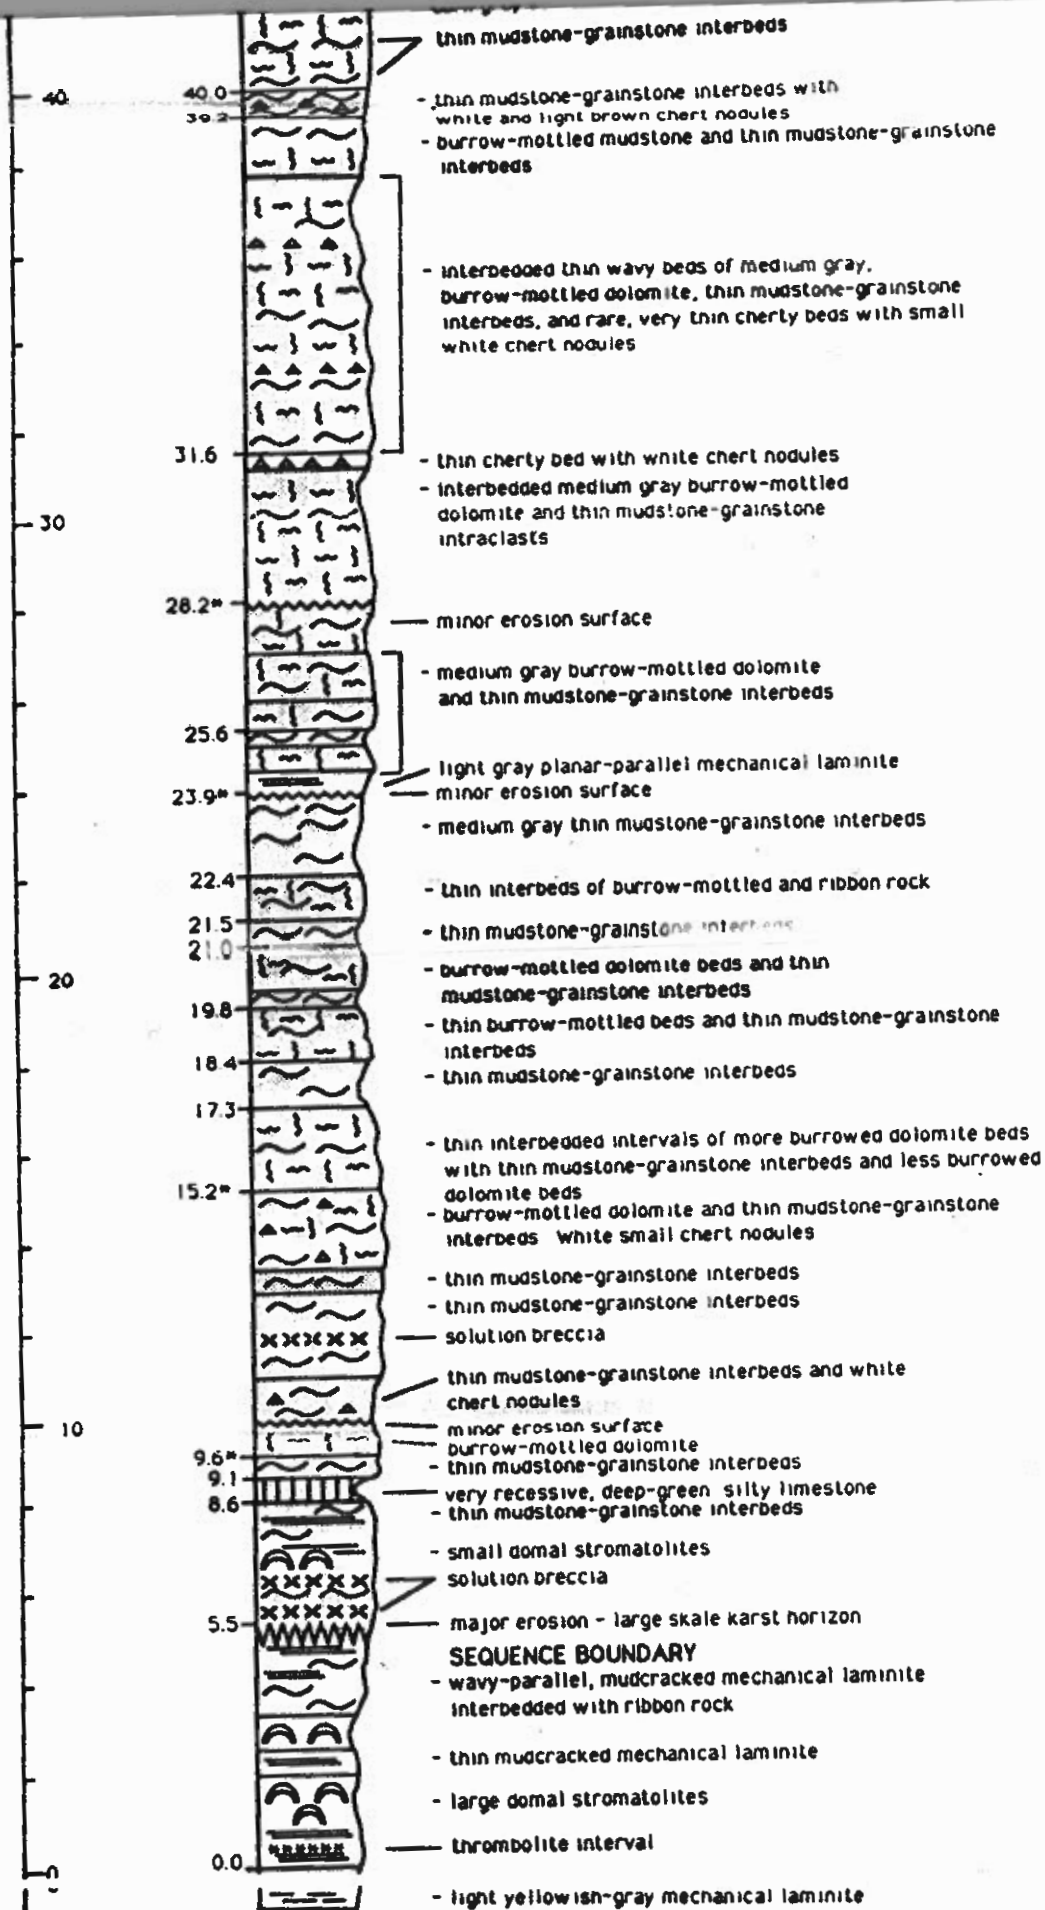

EHST

TST

SEQUENCE 1

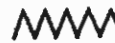

# LÉGEND:

|                                                                                     |                                                       |                                                                                     |                                         |
|-------------------------------------------------------------------------------------|-------------------------------------------------------|-------------------------------------------------------------------------------------|-----------------------------------------|
| 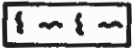   | - burrow-mottling                                     |    | - volcanic ash                          |
|    | - fine lamination                                     |    | - chert nodules                         |
|    | - thin, interbedded mudstone-grainstone (ribbon-rock) |    | - chert lenses                          |
|    | - nodular texture                                     |    | - mudcracks                             |
|    | - intraclastic grainstone                             |    | - teepee structures                     |
|    | - oolitic grainstone                                  |    | - incised valley fill                   |
|    | - bioclastic grainstone                               |    | - minor erosion surface                 |
|    | - glauconitic grainstone                              |    | - major erosion surface (karst horizon) |
|   | - LLH-stromatolites                                   |   | - cross-bedding                         |
|  | - SH-stromatolites                                    |  | - meters from base of section           |
|  | - siltstone                                           |  | - painted marks on rock                 |
|  | - homogeneous dolomite                                |  | - transgressive systems tract           |
|  | - solution breccia                                    |  | - highstand systems tract               |
|  | - thrombolite                                         |  | - lowstand systems tract                |
|  | - qtz. sandstone                                      |  | - early highstand systems tract         |
|  | - shading shows relative color intensity              |  | - late highstand systems tract          |
